# Supplementary material
Source: HighWire-hosted journal article supplement (https://erj.ersjournals.com/content/57/2/2004247)
Supplement: inline-supplementary-material-1 [file inline-supplementary-material-1.pdf]

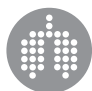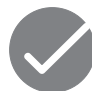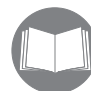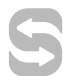

SHAREABLE PDF

# Noninvasive strategies in COVID-19: epistemology, randomised trials, guidelines, physiology

Martin J. Tobin, Amal Jubran and Franco Laghi

**Affiliation:** Division of Pulmonary and Critical Care Medicine, Hines Veterans Affairs Hospital and Loyola University of Chicago Stritch School of Medicine, Hines, IL, USA.

**Correspondence:** Martin J. Tobin, Division of Pulmonary and Critical Care Medicine, Hines Veterans Affairs Hospital and Loyola University of Chicago Stritch School of Medicine, Hines, Illinois 60141, USA.  
E-mail: mtobin2@lumc.edu

 @ERSpublications

Two recent *ERJ* articles demonstrate dramatic benefit with CPAP in COVID-19 patients, highlighting problems with the landmark trial of CPAP (and related guidelines) and illustrating the danger of believing that trials capture the truth of clinical practice <https://bit.ly/3pVp78e>

**Cite this article as:** Tobin MJ, Jubran A, Laghi F. Noninvasive strategies in COVID-19: epistemology, randomised trials, guidelines, physiology. *Eur Respir J* 2021; 57: 2004247 [<https://doi.org/10.1183/13993003.04247-2020>].

This single-page version can be shared freely online.

Coronavirus disease 2019 (COVID-19) is producing seismic changes in society at large and the action of doctors is receiving greater attention from the public than ever in our lifetime. The medical care provided to millions of patients suffering from a single disease constitutes an experiment of nature of extraordinary proportions. The release of voluminous data into medical journals provides the spur to meditate on long-held assumptions about the way we interpret clinical research.
